# Supplementary material
Source: publisher site journal article supplement (https://www.dovepress.com/article/491893)
Supplement: Supplementary file 1 [file get_supplementary_file.php]

S-Table 1. Correlation analysis between the scale of group and PVT behavior

S-Table 1: Abbreviations: NT1, narcolepsy type 1; RT: lapses (RT > 500ms) included; RT500: lapses excluded; RT-1s: reaction times >1000ms excluded; RT-L30: the last 30 out of 75 stimuli; PSQI, Pittsburgh Sleep Quality Index; MoCA, Montreal Cognitive Assessment; ESS, Epworth Sleepiness Scale; PHQ-9, Patient Health Questionnaire-9; BIS-11, Barratt Impulsiveness Scale Version 11.

| Group | | **NT1** | | | | |  | **CONTROL** | | | | |
| --- | --- | --- | --- | --- | --- | --- | --- | --- | --- | --- | --- | --- |
|  | | PSQI | MOCA | ESS | PHQ9 | BIS11 |  | PSQI | MOCA | ESS | PHQ9 | BIS11 |
| False RT | Pearson | 0.184 | -0.057 | 0.178 | 0.102 | 0.265 |  | 0.435 | -0.445 | 0.062 | 0.295 | 0.318 |
| sig. | 0.242 | 0.718 | 0.259 | 0.520 | 0.090 |  | 0.018 | 0.012 | 0.750 | 0.120 | 0.093 |
| RT | Pearson | 0.018 | 0.162 | 0.266 | 0.320 | 0.047 |  | 0.267 | -0.408 | 0.14 | 0.453 | 0.344 |
| sig. | 0.913 | 0.318 | 0.097 | 0.044 | 0.775 |  | 0.153 | 0.028 | 0.47 | 0.012 | 0.063 |
| RT500 | Pearson | 0.104 | 0.108 | 0.101 | 0.092 | 0.011 |  | 0.173 | -0.445 | 0.182 | 0.448 | 0.465 |
| sig. | 0.512 | 0.495 | 0.525 | 0.561 | 0.946 |  | 0.361 | 0.012 | 0.327 | 0.012 | 0.008 |
| RT-1s | Pearson | 0.178 | 0.003 | 0.113 | 0.036 | 0.165 |  | 0.259 | -0.5 | 0.193 | 0.505 | 0.471 |
| sig. | 0.261 | 0.983 | 0.477 | 0.82 | 0.295 |  | 0.166 | 0.004 | 0.299 | 0.004 | 0.007 |
| RT-L30 | Pearson | 0.068 | 0.129 | 0.178 | 0.262 | 0.3 |  | 0.231 | -0.362 | 0.142 | 0.293 | 0.344 |
| sig. | 0.678 | 0.429 | 0.27 | 0.102 | 0.06 |  | 0.22 | 0.053 | 0.47 | 0.116 | 0.063 |

| NT1 | | SE | ArI | N3% | REM% | MSLT-SL | Orexin |
| --- | --- | --- | --- | --- | --- | --- | --- |
| False RT | Pearson | 0.018 | -0.201 | -0.045 | 0.244 | -0.068 | -0.004 |
| sig. | 0.918 | 0.271 | 0.795 | 0.165 | 0.67 | 0.984 |
| RT | Pearson | -0.001 | -0.080 | 0.042 | 0.251 | -0.095 | 0.062 |
| sig. | 0.994 | 0.674 | 0.815 | 0.16 | 0.561 | 0.779 |
| RT500 | Pearson | 0.109 | -0.199 | -0.067 | 0.360 | -0.09 | 0.100 |
| sig. | 0.520 | 0.276 | 0.698 | 0.034 | 0.576 | 0.641 |
| RT-1s | Pearson | 0.129 | -0.226 | -0.146 | 0.420 | -0.091 | 0.024 |
| sig. | 0.447 | 0.213 | 0.394 | 0.012 | 0.573 | 0.912 |
| RT-L30 | Pearson | -0.055 | -0.011 | 0.028 | 0.215 | -0.03 | 0.060 |
| sig. | 0.755 | 0.955 | 0.875 | 0.229 | 0.856 | 0.787 |

S-Table 2. Correlation analysis between clinical manifestations and PVT behavior in NT1 group.

S-Table 2: Abbreviations: NT1, narcolepsy type 1; SE, Sleep efficiency; ArI, arousal index; N3%, N3 sleep proportion; REM%, REM sleep proportion; MSLT-SL, Sleep latency in Multiple Sleep Latency Test; Orexin, concentration of orexin in CSF.
